# Supplementary material
Source: publisher site journal article supplement (https://www.dovepress.com/article/394201)
Supplement: Supplementary file 1 [file get_supplementary_file.php]

**Supplementary Table S1**

**Supplementary Table S1 Medication Adherence Assessment Scale**

| NO. | Medication adherence questions | Never | Occasional | Often | Always |
| --- | --- | --- | --- | --- | --- |
| 1 | Do you take or used medication as prescribed by the doctor every day for the last 3 months? | 1 | 2 | 3 | 4 |
| 2 | Do ​you sometimes forget to take or use medication for the last 3 months? | 4 | 3 | 2 | 1 |
| 3 | Do you take every medication as prescribed dosage? | 1 | 2 | 3 | 4 |
| 4 | No attention was paid to the time interval between the medications | 4 | 3 | 2 | 1 |
| 5 | Do you adjust your dosage or stop taking your medication without consulting your doctor when symptoms change or other symptoms occur? | 4 | 3 | 2 | 1 |
| 6 | Do you have trouble remembering to take your medication on time and in the dose? | 4 | 3 | 2 | 1 |
| 7 | Have you visited the hospital on time in the last 3 months? | 1 | 2 | 3 | 4 |
| 8 | Do you know the indications and precautions for each drug? | 1 | 2 | 3 | 4 |
| 9 | Do you think the more expensive the drug, the safer and more effective it is? | 4 | 3 | 2 | 1 |

**Supplementary Table S2**

**Supplementary Table S2 Behavior and Lifestyle Compliance Assessment Scale**

| NO. | Questions | Never | Occasional | Often | Always |
| --- | --- | --- | --- | --- | --- |
| 1 | Do you [purchase](javascript:;) medicines by yourself based on your friends' recommendations, advertisements, or your own experience? | 4 | 3 | 2 | 1 |
| 2 | Do you follow your doctor's advice to eat the right amount of calories, eat regularly, and control your weight? | 1 | 2 | 3 | 4 |
| 3 | Will you be careful to put less salt in your diet (< 6g/ day) and eat less or no salty food? | 1 | 2 | 3 | 4 |
| 4 | Do you pay attention to reducing the oil intake in your diet (25-30g/d) and not eating fatty meat? | 1 | 2 | 3 | 4 |
| 5 | Do you add fresh vegetables (> 500g/d) and fruit to your diet? | 1 | 2 | 3 | 4 |
| 6 | Do you consume moderate amounts of protein (0.8g/kg/d), fish, poultry, eggs, and lean meat (120-200g/d) daily? | 1 | 2 | 3 | 4 |
| 7 | Do you exercise regularly (Aerobic exercise, 30 minutes or more, 3-5 times a week)? | 1 | 2 | 3 | 4 |
| 8 | Do you regularly monitor blood pressure, glucose, lipids, uric acid, and other indicators as recommended by medical staff? | 1 | 2 | 3 | 4 |
| 9 | Are you able to follow the doctor's orders? | 1 | 2 | 3 | 4 |

**Supplementary Table S3**

**Supplementary Table S3 Results of one-way ANOVA of medication adherence**

| Characteristic | Attribute and Units | Good-Moderate adherence, n=935 | Poor adherence, n=447 | *P-value |
| --- | --- | --- | --- | --- |
| Gender | Male | 237 | 126 | 0.001a |
| Female | 278 | 233 |
| Age(year) |  | 63.28±11.94 | 61.95±11.70 | 0.034b |
| Age group | ＜45 | 31 | 23 | 0.018a |
| 45～＜60 | 144 | 70 |
| 60～＜75 | 242 | 128 |
| ≥75 | 98 | 27 |
| Level of education | Primary | 153 | 81 | 0.710a |
| Secondary | 245 | 113 |
| University degree or above | 117 | 54 |
| BMI（kg/m2） |  | 25.94±4.91 | 28.24±5.15 | 0.250b |
| BMI group | ＜24 | 175 | 89 | 0.043a |
| 24～＜28 | 235 | 92 |
| ≥28 | 105 | 67 |
| Smoking | Yes | 80 | 56 | 0.017a |
| No | 435 | 192 |  |
| Drinking | Yes | 193 | 94 | 0.339a |
| No | 742 | 353 |
| Working status | Be on the job | 122 | 63 | 0.475a |
| Retired | 356 | 162 |
| Others# | 37 | 23 |
| Monthly income（dollar） | ＜700 | 264 | 153 | 0.024a |
| 700～1400 | 197 | 73 |
| ＞1400 | 54 | 22 |
| Duration of diabetes(years) | ≤5 | 181 | 94 | 0.181a |
| 6～10 | 108 | 62 |
| ＞10 | 226 | 92 |
| Combined chronic diseases | Yes | 192 | 84 | 0.358a |
| No | 323 | 164 |
| Monitor blood glucose regularly | Yes | 157 | 56 | 0.023a |
| No | 358 | 192 |
| Participated in diabetes education | Yes | 227 | 118 | 0.363a |
| No | 288 | 130 |
| Blood glucose control levels | Known | 303 | 140 | 0.613a |
| Not entirely clear | 194 | 96 |
| Unknown | 18 | 12 |
| Number of DM drugs | ≤2 | 408 | 199 | 0.744a |
| ≥3 | 107 | 49 |
| Duration of drug used(years) | ≤1 | 74 | 32 | 0.025a |
| 2～5 | 156 | 84 |
| 6～10 | 90 | 61 |
| ＞10 | 195 | 71 |
| Use of medications empirically | Never | 431 | 142 | ＜0.001a |
| Occasionally | 75 | 94 |
| Often | 9 | 12 |
| Monitoring blood glucose according to the doctor's advice | No execution | 31 | 18 | 0.004a |
| Occasional execution | 194 | 125 |
| Frequent execution | 190 | 72 |
| Always execution | 100 | 33 |
| Following the doctor’s advice to visit | No execution | 19 | 14 | ＜0.001a |
| Occasional execution | 107 | 96 |
| Frequent execution | 236 | 95 |
| Always execution | 153 | 43 |
| Lifestyle compliance score | ＞27 | 190 | 53 | ＜0.001a |
| 18～27 | 308 | 170 |
| ＜18 | 17 | 25 |

*P-value by Chi-square test, aChi-square test, bMann-Whitney test. Data were presented as n or mean ± SD*.* #Others=farming, unemployed, school. *P*=Significance, BMI=Body mass index, DM= Diabetes mellitus
